# Supplementary material
Source: PubMed Central journal article supplement (PMC8020783)
Supplement: pnas.2022720118.sapp.pdf [file pnas.2022720118.sapp.pdf]

1 **Table S1. List of strains used in this study.**

| Strain       | Description                                                              | Designation                              | Source    |
|--------------|--------------------------------------------------------------------------|------------------------------------------|-----------|
| USA300 LAC   | <i>S. aureus</i> USA300 Strain LAC (AH-1263). Plasmid cured.             | AH-LAC (WT)                              | (1)       |
| DH5 $\alpha$ | <i>E. coli</i> strain for recombinant plasmids                           | DH5 $\alpha$                             | (2)       |
| RN4220       | Restriction-deficient <i>S. aureus</i>                                   | RN4220                                   | (3)       |
| RN6390       | <i>S. aureus</i> 8325 derivative                                         | RN6390                                   | (4, 5)    |
| Newman       | Osteomyelitis isolate - 1952                                             | Newman                                   | (6)       |
| COL          | Early MRSA isolate                                                       | COL                                      | (7)       |
| BK2395       | USA500 clinical Isolate                                                  | USA500                                   | (8, 9)    |
| RN9011       | RN4220 + pRN7203 expressing SaPI integrase                               | RN9011                                   | (10)      |
| FA-S1176     | AH-LAC $\Delta lipL$                                                     | $\Delta lipL$                            | (11)      |
| FA-S1178     | AH-LAC $\Delta lipA \Delta lplA1 \Delta lplA2$                           | $\Delta lipA \Delta lplA1 \Delta lplA2$  | (12)      |
| FA-S973      | AH-LAC $\Delta geh::kan$                                                 | $\Delta geh$                             | (13)      |
| FA-S2192     | AH-LAC $\Delta bmfBB::kan$                                               | $\Delta bmfBB::kan$                      | This work |
| FA-S2143     | AH-LAC $\Delta lipL \Delta geh::kan$                                     | $\Delta lipL \Delta geh$                 | This work |
| FA-S2167     | AH-LAC $\Delta lipL \Delta geh::kan$ containing pJC1112- <i>geh</i>      | $\Delta lipL \Delta geh + geh$           | This work |
| FA-S2304     | AH-LAC $\Delta bmfBB \Delta pdhC::kan$                                   | $\Delta bmfBB \Delta pdhC$               | This work |
| FA-S2230     | AH-LAC $\Delta fakB1$                                                    | $\Delta fakB1$                           | This work |
| FA-S2232     | AH-LAC $\Delta fakB2$                                                    | $\Delta fakB2$                           | This work |
| FA-S2242     | AH-LAC $\Delta bmfBB::kan \Delta fakB1$                                  | $\Delta bmfBB::kan \Delta fakB1$         | This work |
| FA-S2244     | AH-LAC $\Delta bmfBB::kan \Delta fakB2$                                  | $\Delta bmfBB::kan \Delta fakB2$         | This work |
| FA-S2260     | AH-LAC $\Delta bmfBB::kan \Delta fakB2$ containing pJC1111- <i>fakB2</i> | $\Delta bmfBB::kan \Delta fakB2 + fakB2$ | This work |
| FA-S2351     | RN4220 $\Delta bmfBB::kan$                                               | RN4220 $\Delta bmfBB$                    | This work |
| FA-S2358     | RN6390 $\Delta bmfBB::kan$                                               | RN6390 $\Delta bmfBB$                    | This work |
| FA-S2354     | Newman $\Delta bmfBB::kan$ ( <i>geh</i> disrupted)                       | Newman $\Delta bmfBB$                    | This work |
| FA-S2355     | COL $\Delta bmfBB::kan$ ( <i>geh</i> disrupted)                          | COL $\Delta bmfBB$                       | This work |
| FA-S2356     | BK2395 $\Delta bmfBB::kan$                                               | USA500 $\Delta bmfBB$                    | This work |

2

3

4

5

6

7

8 **Table S2. List of oligonucleotides used in this study.**

| Name                       | Sequence                                                                            |
|----------------------------|-------------------------------------------------------------------------------------|
| bmfBBSOE1- <b>KpnI</b>     | CCC <b>GGTACC</b> GCTAAAGGGCTTTTATTATCA                                             |
| bmfBBSOE2- <b>KasI</b>     | ATAGATGCATCTATGTTATCAG <b>GGCGCC</b> ACTTTCCCTCCCTAGAATT                            |
| bmfBBSOE3- <b>KasI</b>     | AATTCTAGGGAGGGAAAGT <b>GGCGCC</b> TGATAACATAGATGCATCTAT                             |
| bmfBBSOE4- <b>SacI</b>     | CCC <b>GAGCTC</b> GCTGGTCTGGCGATACCA                                                |
| kanF- <b>KasI</b>          | TCCC <b>GGCGCC</b> CTCGACGATAAACCCAGCGAAC                                           |
| kanR- <b>KasI</b>          | TCCC <b>GGCGCC</b> CTTTTTAGACATCTAAATCTAGGTAC                                       |
| fakB1SOE1- <b>KpnI</b>     | ATAT <b>GGTACC</b> AGCACCGCTATAGGCG                                                 |
| fakB1SOE2                  | CGAGAGATAATTTCCAATTACAATATAGACTCTTTTATTTAAATTTTATAA<br>AGTCGTCCTCCTAAAATATACTCATAGC |
| fakB1SOE3                  | GCTATGAGTATATTTTAGGAGGACGACTTTATAAAATTTTAATAAAAGAG<br>TCTATATTGTAATTGGAAATTATCTCTCG |
| fakB1SOE4- <b>SacI</b>     | ATAT <b>GAGCTC</b> TGTCTCTTTCTAATGGCTCGAAC                                          |
| fakB2SOE1- <b>KpnI</b>     | ATAT <b>GGTACC</b> ATAATTATGACTTTATCCATTCTAGTTGCACATG                               |
| fakB2SOE2                  | TGAAATGGAAGTAATTAACACTGAAAAGATTAATGGTCGTTTTCCCCCT<br>TATTTTTTAC                     |
| fakB2SOE3                  | GTAAAAAATAAGGGGGAAAACGACCATTTAATCTTTTCAGTGTTAATTAC<br>TTCCATTTCA                    |
| fakB2SOE4- <b>SacI</b>     | ATAT <b>GAGCTC</b> GATAGAAATTTTATATGGTTTAATAGGTGTAATCACTGG                          |
| UniCompSOE1- <b>PstI</b>   | ATAT <b>CTGCAG</b> ATCCCATTATGCTTTGGCA                                              |
| fakB2CompSOE2              | GAGTCTGTTACTATAATCTGTTTTGTCATGGGTTTCACTCTCCTTCTAC                                   |
| fakB2CompSOE3              | GTAGAAGGAGAGTGAAACCCATGACAAAACAGATTATAGTAACAGACTC                                   |
| fakB2CompSOE4- <b>SacI</b> | ATAT <b>GAGCTC</b> GATGTAATGGTTTAACCATGCAC                                          |

9

10

11

12

13

14

15

16

17

18

19

## 20 References

- 21 1. B. R. Boles, M. Thoendel, A. J. Roth, A. R. Horswill, Identification of genes involved  
22 in polysaccharide-independent *Staphylococcus aureus* biofilm formation. *PLOS ONE*  
23 **5**, e10146 (2010).
- 24 2. M. R. Green, J. Sambrook, J. Sambrook, *Molecular cloning: a laboratory manual*, 4th  
25 ed (Cold Spring Harbor Laboratory Press, 2012).
- 26 3. R. P. Novick, “[27] Genetic systems in staphylococci” in *Methods in enzymology*,  
27 bacterial genetic systems., (Academic Press, 1991), pp. 587–636.
- 28 4. H. L. Peng, R. P. Novick, B. Kreiswirth, J. Kornblum, P. Schlievert, Cloning,  
29 characterization, and sequencing of an accessory gene regulator (agr) in  
30 *Staphylococcus aureus*. *J Bacteriol* **170**, 4365–4372 (1988).
- 31 5. K. T. Bæk, D. Frees, A. Renzoni, C. Barras, N. Rodriguez, C. Manzano, W. L. Kelley,  
32 Genetic variation in the *Staphylococcus aureus* 8325 strain lineage revealed by  
33 whole-genome sequencing. *PLoS One* **8**, e77122 (2013).
- 34 6. E. S. Duthie, L. L. Lorenz, Staphylococcal coagulase; mode of action and antigenicity.  
35 *J Gen Microbiol* **6**, 95–107 (1952).
- 36 7. H. de Lencastre, A. Tomasz, Reassessment of the number of auxiliary genes  
37 essential for expression of high-level methicillin resistance in *Staphylococcus aureus*.  
38 *Antimicrob Agents Chemother* **38**, 2590–2598 (1994).
- 39 8. K. G. Dyke, Penicillinase production and intrinsic resistance to penicillins in methicillin-  
40 resistant cultures of *Staphylococcus aureus*. *J Med Microbiol* **2**, 261–278 (1969).
- 41 9. R. B. Roberts, A. de Lencastre, W. Eisner, E. P. Severina, B. Shopsin, B. N. Kreiswirth,  
42 A. Tomasz, Molecular epidemiology of methicillin-resistant *Staphylococcus aureus* in  
43 12 New York hospitals. MRSA Collaborative Study Group. *J Infect Dis* **178**, 164–171  
44 (1998).
- 45 10. J. Chen, P. Yoong, G. Ram, V. J. Torres, R. P. Novick, Single-copy vectors for  
46 integration at the SaPI1 attachment site for *Staphylococcus aureus*. *Plasmid* **76**, 1–7  
47 (2014).
- 48 11. W. P. Teoh, Z. J. Resko, S. Flury, F. Alonzo 3rd, Dynamic relay of protein-bound lipoid  
49 acid in *Staphylococcus aureus*. *Journal of Bacteriology* **201** (2019).
- 50 12. A. Zorzoli, J. P. Grayczyk, F. Alonzo 3rd, *Staphylococcus aureus* tissue infection  
51 during sepsis is supported by differential use of bacterial or host-derived lipoid acid.  
52 *PLOS Pathogens* **12**, e1005933 (2016).

53 13. X. Chen, F. Alonzo 3rd, Bacterial lipolysis of immune-activating ligands promotes  
54 evasion of innate defenses. *PNAS* **116**, 3764–3773 (2019).

55
